# Supplementary material for: Characterization of a new genotype of avian bornavirus from wild ducks
Source: PubMed Central journal article supplement (PMC4239314; doi:10.1186/s12985-014-0197-9), 2014-11-19
Supplement: 12985_2014_197_MOESM1_ESM.pdf [file 12985_2014_197_MOESM1_ESM.pdf]

1 10 20 30 40 50 60 70 80  
Consensus A T T A T C T C A C A A T C G A C G T T G A G C C T T G T G G T C A T T C G C T T G C A A A C G T C T A C T T C C A G A T T G A T G A T T T C T T G G C T C T T G C G C T T A  
Frame 3 Y L T I D V E P C G H S L A N V Y F Q I D D F L A L A L

Identity

1. MALL89 A T T A T C T C A C A A T C G A C G T T G A G C C T T G T G G T C A T T C G C T T G C A A A C G T C T A C T T C C A G A T T G A T G A T T T C T T G G C T C T T G C G C T T A  
Frame 3 Y L T I D V E P C G H S L A N V Y F Q I D D F L A L A L  
2. MALL50 A T T A T C T C A C A A T C G A C G T T G A G C C T T G T G G T C A T T C G C T T G C A A A C G T C T A C T T C C A G A T T G A T G A T T T C T T G G C T C T T G C G C T T A  
Frame 3 Y L T I D V E P C G H S L A N V Y F Q I D D F L A L A L  
3. MALL90 A T T A T C T C A C A A T C G A C G T T G A G C C T T G T G G T C A T T C G C T T G C A A A C G T C T A C T T C C A G A T T G A T G A T T T C T T G G C T C T T G C G C T T A  
Frame 3 Y L T I D V E P C G H S L A N V Y F Q I D D F L A L A L  
4. MALL77 A T T A T C T C A C A A T C G A C G T T G A G C C T T G T G G T C A T T C G C T T G C A A A C G C C T A C T T C C A G A T T G A T G A T T T C T T G G C T C T T G C G C T T A  
Frame 3 Y L T I D V E P C G H S L A N A Y F Q I D D F L A L A L

90 100 110 120 130 140 150 160 170 174  
Consensus A T G C A T T G G C T G T C T A C A C C A A C C C T A T A A A G A A G T A C A T G T T C A T C C G G C T C A A C G A G G A G C A G A G C A A G C A T G C G A T C A A T G C A G  
Frame 3 N A L A V Y T N P I K K Y M F I R L N E E Q S K H A I N A

Identity

1. MALL89 A T G C A T T G G C T G T C T A C A C C A A C C C T A T A A A G A A G T A C A T G T T C A T C C G G C T C A A C G A G G A G C A G A G C A A G C A T G C G A T C A A T G C A G  
Frame 3 N A L A V Y T N P I K K Y M F I R L N E E Q S K H A I N A  
2. MALL50 A T G C A T T G G C T G T C T A C A C C A A C C C T A T A A A G A A G T A C A T G T T C A T C C G G C T C A A C G A G G A G C A G A G C A A G C A T G C G A T C A A T G C A G  
Frame 3 N A L A V Y T N P I K K Y M F I R L N E E Q S K H A I N A  
3. MALL90 A T G C A T T G G C T G T C T A C A C C A A C C C T A T A A A G A A G T A C A T G T T C A T C C G G C T C A A C G A G G A G C A G A G C A A G C A T G C G A T C A A T G C A G  
Frame 3 N A L A V Y T N P I K K Y M F I R L N E E Q S K H A I N A  
4. MALL77 A T G C A T T G G C T G T C T A C A C C A A C C C T A T A A A G A A G T A C A T G T T C A T C C G G C C C A C C G A G G A G C A G A G C A C G C A T G C C A T C A A T G C A G  
Frame 3 N A L A V Y T N P I K K Y M F I R P T E E Q S T H A I N A
